1

2

3

4

5 **Title**

6 MNase profiling of promoter chromatin in *S. typhimurium*-stimulated GM12878 cells

7 reveals dynamic and response-specific nucleosome architecture

8

9 **Authors**

10 Lauren Cole and Jonathan Dennis

11

12 **Affiliation**

13 Department of Biological Science, Florida State University, Tallahassee, FL 32306

14

15

1  
2  
3  
4  
5  
6  
7  
8  
9  
10  
11  
12  
13  
14  
15  
16  
17  
18  
19  
20  
21  
22  
23

**Running Title**

Nucleosome profiling in GM12878

**Key words**

chromatin, nucleosome, micrococcal nuclease, GM12878, *Salmonella typhimurium*

**Corresponding Author**

Jonathan H. Dennis  
Department of Biological Science, KIN 2023  
319 Stadium Drive  
Florida State University  
Tallahassee, FL 32306-4295  
(850) 645-9274  
dennis@bio.fsu.edu

1  
2  
3  
4  
5  
6  
7  
8  
9  
10  
11  
12  
13  
14  
15  
16  
17  
18  
19  
20  
21  
22  
23

**Abstract**

The nucleosome is the primary unit of chromatin structure and commonly imputed as a regulator of nuclear events, although the exact mechanisms remain unclear. Recent studies have shown that certain nucleosomes can have different sensitivities to micrococcal nuclease (MNase) digestion, resulting in the release of populations of nucleosomes dependent on the concentration of MNase. Mapping MNase sensitivity of nucleosomes at transcription start sites genome-wide reveals an important functional nucleosome organization that correlates with gene expression levels and transcription factor binding. In order to understand nucleosome distribution and sensitivity dynamics during a robust genome response, we mapped nucleosome position and sensitivity using multiple concentrations of MNase. We use the innate immune response as a model system to understand chromatin-mediated regulation. Herein we demonstrate that stimulation of a human lymphoblastoid cell line (GM12878) with heat-killed *Salmonella typhimurium* (HKST) results in widespread nucleosome remodeling of response-specific loci. We further show that the response alters the sensitivity of promoter nucleosomes. Finally, we correlate the increased sensitivity with response-specific transcription factor binding. These results indicate that nucleosome distribution and sensitivity dynamics are integral to appropriate cellular response and pave the way for further studies that will deepen our understanding of the specificity of genome response.

1  
2  
3  
4  
5  
6  
7  
8  
9  
10  
11  
12  
13  
14  
15  
16  
17  
18  
19  
20  
21  
22  
23

### **Introduction**

The functional role of chromatin is inseparable from an appropriate cellular response to a stimulus. The fundamental subunit of chromatin is the nucleosome, composed of a histone octamer core and approximately 150bp of DNA (Kornberg, 1999). It is commonly asserted that the occupancy and position of nucleosomes can provide access to the underlying DNA sequence, thus affecting nuclear processes (Kaplan et al., 2009). The distribution of nucleosomes across the genome is controlled by chromatin remodeling complexes and DNA sequence (Gupta et al., 2008). However, characterization of the functional organization of the genome remains a major challenge in biology today. Micrococcal nuclease (MNase) was first used to isolate nucleosomal DNA from the chicken beta-globin gene (Sun et al., 1986). It remains the predominant method for generation of nucleosome occupancy maps in eukaryotic genomes, and previous studies have mapped changes in chromatin structure during differentiation, environmental stimulus or stress, and disease states (Shivaswamy et al., 2008; Teif et al., 2012; Druliner et al., 2013; Sexton et al., 2014, Sexton et al., 2016). Additionally, it has been recently shown that nucleosomes exhibit differential sensitivity to MNase. The sensitivity of promoter nucleosomes, particularly the +1 and -1 nucleosomes relative to the transcription start- and regulatory factor- binding sites, is a defining chromatin characteristic that gives insight into chromatin-mediated regulation of these loci. The importance of characterizing this differential sensitivity of chromatin has been



1 demonstrated in multiple organisms and is an important variable to consider (Vera et al.  
2 2014, Mieczkowski et al., 2016, Cherije et al. 2019).

3  
4 In order to investigate the role of nucleosome dynamics during the innate immune  
5 response, we have mapped nucleosome position and sensitivity at all human promoters  
6 in GM12878 lymphoblastoid cells stimulated with heat killed *Salmonella typhimurium*  
7 (HKST) . We mapped nucleosome distributions with two MNase levels: one heavy  
8 digestion level and one light digestion level. The comparison of these different MNase  
9 digestion levels reveals important information about transcription factor binding, gene  
10 expression prediction, and sensitivity of chromatin to digestion (Vera et al., 2014,  
11 Mieczkowski et al., 2016, Pass et al., 2017, Brahma and Henikoff 2019). The  
12 complicated interplay between chromatin remodeling complexes and the specific  
13 epigenetic landscape is largely unknown and is likely responsible for the diverse kinetics  
14 of the immune response (Ramirez-Carrozzi et al., 2006, Natoli 2010, Dorrington and  
15 Fraser 2019). Here we show that stimulation of a human lymphoblastoid cell line with  
16 HKST causes changes in promoter nucleosome distribution as well as changes in  
17 sensitivity to MNase. We find that 10% of promoters in the 20m HKST treatment gain  
18 nucleosome occupancy upstream of the TSS (-1 nucleosome) compared to the  
19 untreated control. Furthermore, we find that the -1 nucleosome becomes less sensitive  
20 to MNase during the 20m HKST treatment and that immune transcription factor binding  
21 at the TSS (NFkB, Pu1, and Ebf1) is associated with flanking nucleosomes sensitive to  
22 MNase digestion.

1 **Materials and Methods**

2

3 *Cell culture:* Cell GM12878 cells were grown at 37°C in 15% FBS-supplemented RPMI  
4 medium. Cells were stimulated with  $1.0 \times 10^9$  heat-killed *Salmonella typhimurium* (HKST;  
5 15 minutes at 80°C) for 20 minutes, 40 minutes and 60 minutes and harvested at the end  
6 of each time point.

7

8 *Cell harvest and nuclei purification:* Approximately  $1 \times 10^7$  cells were harvested, cross-  
9 linked in 1% formaldehyde, and incubated for 10 min at room temperature. After the 10  
10 min incubation, the cross-linking reaction was quenched with 125 mM glycine. Next, the  
11 nuclei were isolated in nucleus isolation buffer containing: 10 mM HEPES at pH 7.8, 2  
12 mM  $MgOAc_2$ , 0.3 M sucrose, 1 mM  $CaCl_2$ , and 1% Nonidet P-40. The nuclei were then  
13 pelleted by centrifugation at 1000g for 5 min at 4°C.

14

15 *MNase digestion of chromatin:* At each time point  $\sim 2.5 \times 10^6$  nuclei were treated with  
16 light (40U MNase/mL) and heavy MNase-digestion conditions (400U MNase/mL), see  
17 average fragment size distribution in **Fig. S1B**. The chromatin at each time point was  
18 digested with the respective concentration of MNase for five minutes at 37°C and  
19 stopped with EDTA. DNA from MNase-digested nuclei was isolated via phenol-  
20 chloroform extraction and mononucleosome sized bands resolved with a 2% agarose  
21 gel. The  $\sim 150$ bp mononucleosomal band was excised for each time point and MNase  
22 concentration. Additionally, two untreated control samples were harvested and  
23 processed as described, and have been referenced here as untreated samples.

1  
2 *Mononucleosome DNA Library Preparation:* MNase sequencing libraries were prepared  
3 using NEBNext Ultra DNA library Prep Kit for Illumina (NEB #E7370S), using 30ng of  
4 input mononucleosomal DNA from each digestion level and time point. Following end-  
5 prep and adaptor ligation, the libraries were purified with AMPure XP beads. Universal  
6 and index primers from NEBNext Multiplex Oligos for Illumina (NEB #E7335S) were  
7 incorporated by a 12 cycle PCR. Library size and quality was verified with the Agilent  
8 2100 Bioanalyzer. Molar concentration of indexed library was determined by KAPA  
9 quantitative PCR and size corrected using sizing information from the Bioanalyzer.  
10  
11 *Solution-based Sequence Capture and Illumina Flowcell hybridization and sequencing:*  
12 Previously, we combined MNase-seq with in-solution targeted enrichment of 2 kb  
13 surrounding TSSs of 21,857 human genes (Druliner et al., 2016; Sexton et al., 2016), as  
14 curated by NCBI RefSeq (Pruitt et al., 2009). We termed this approach Transcription  
15 Start Site MNase-seq (mTSS-seq). Size selected fragments (~50-200 bp) were used to  
16 prepare Illumina sequencing libraries and subjected to targeted enrichment utilizing the  
17 custom-designed Roche Nimblegen SeqCap EZ Library. DNA fragments were captured  
18 according to the Roche Nimblegen protocol. By qPCR we observe ~300 fold enrichment  
19 of sample target genes compared to off-target loci. Paired-end reads (see below) were  
20 aligned to the hg19 genome assembly (IHGSC 2001) and read densities were inspected  
21 with the UCSC genome browser.

1 *HiSeq 2500 data processing:* Illumina adapters were clipped and aligned to the HG19  
2 genome assembly, with unpaired and non-uniquely aligned reads discarded (bowtie2,  
3 samtools). Mononucleosome-sized fragments were used to infer nucleosome position.  
4 Nucleosome occupancy profiles were obtained by calculating the fragments per million  
5 that mapped at each base-pair in the SeqCap regions (bedtoolsCoverage). Midpoints  
6 for nucleosome distributions were determined through the calculation of center  
7 fragments in 60 bp windows at a 10 bp step in the 2kb surrounding each TSS. Data was  
8 subsequently processed in R (<https://github.com/dvera>).

9  
10 *Data Availability:* The data discussed in this publication have been deposited in NCBI's  
11 Gene Expression Omnibus (Edgar et al., 2002) and are accessible through GEO Series  
12 accession number GSE139224.

13

1 **Results**

2

3 HKST stimulation of B-lymphoblastoid cells results in changes in promoter nucleosome  
4 occupancy

5 We have mapped nucleosome distribution during the immune response to HKST.

6 MNase Transcription Start Site-enriched sequencing (mTSS-seq) allows for high quality  
7 nucleosome maps at all human promoters (**Fig. S1**). mTSS-seq data is highly

8 concordant with the preeminent nucleosome maps in lymphoblastoid cell lines (**Fig.**

9 **S1C**, Gaffney et al., 2012). Work from our lab has measured widespread and transient

10 nucleosome redistributions during viral reactivation (Sexton BS, 2014, Sexton BS,

11 2016). To determine whether nucleosome redistributions were limited to viral

12 reactivation or a broader feature of the immune response, we mapped nucleosome

13 distributions at 20, 40, and 60 minutes following stimulation with HKST. We observed

14 the greatest differences in nucleosome distribution at 20 minutes after stimulation with

15 HKST. We calculated the differences in nucleosome distribution between the untreated

16 cells and the HKST-stimulated time points at all promoters measured. We observe that

17 average nucleosome profile remains similar between the untreated control and

18 timepoints (**Fig. 1A**). However, over a third of all human promoters fall into four distinct

19 clusters which reflect gain or loss of nucleosome occupancy at the nucleosomes +1 and

20 -1 relative to the TSS: documented regulatory nucleosomes (**Fig. 1B**) (Field et al., 2008;

21 El Gazzar et al., 2010, Rando 2012). Cluster 5 in **Figure 1B** reflects a gain of

22 occupancy at the -1 nucleosome, and those promoters are significantly enriched for

23 immune processes and transcription (**Fig. 1C, Table S1**). Cluster 1 (**Figure 1B**)

1 represents loci with more nucleosomal fragments in the untreated control cells, and  
2 gene ontology analysis for this cluster reveals significant enrichment for developmental  
3 processes, post-transcriptional silencing, and differentiation (Eden et al., 2009, **Table**  
4 **S2**). These results suggest that nucleosome occupancy changes over the course of  
5 HKST treatment. Specifically, 20 minutes after HKST stimulation, we observe that 2271  
6 genes (~10% of promoters) show increased nucleosomal occupancy at the -1 position,  
7 and these genes are enriched for transcription regulation and immune-specific  
8 processes. Finally, 35% of the genes in cluster 5 (**Figure 1B**) are also in the top quartile  
9 of expressed genes in GM12878 cells. They are ontologically enriched for B-cell antigen  
10 processing and presentation of exogenous antigen and recombination of  
11 immunoglobulin genes involved in immune response, as well as many important growth-  
12 associated processes (**Table S1**).

13

14 HKST stimulation of B-lymphoblastoid cells results in changes in MNase sensitivity of  
15 promoter nucleosomes

16 We use differences in nuclease sensitivity to distinguish nucleosome-bound fragments  
17 that are readily released when lightly digested (MNase-sensitive fragments, MSFs) from  
18 nucleosome-bound fragments that are resistant to heavy digestion (MNase-resistant  
19 fragments, MRFs). To identify MSFs within our mTSS-seq experiment we calculated the  
20 log<sub>2</sub>ratio of the light/heavy MNase digests. We then sorted the resulting MNase-  
21 sensitivity nucleosome profiles based on maximum expression using existing RNAseq  
22 datasets for GM12878 cells (Davis et al., 2018). We also visualized active transcription  
23 using a ChIP-seq dataset of CTD phosphorylated RNA polymerase II (Pol2ser2) sorted

1 on the same sort order (Davis et al., 2018). We observed a strongly positioned -1  
2 sensitive nucleosome in the top quartile of maximum active transcription, and that this  
3 nucleosome becomes more sensitive in the 20m post-HKST timepoint (**Fig. 2A**). We  
4 also observe less positioned nucleosomes, containing a mix of sensitive and resistant  
5 nucleosomes in the bottom quartile of low and non-expressed genes (**Fig. 2A**).  
6 Consistent with a primary response to bacterial infection (Herschman 1991, Winkles  
7 1998), the largest sensitivity differences were seen at the 20 minute timepoint (**Fig. S2**)  
8  
9 Sensitivity of TSS-flanking nucleosomes is associated with transcription factor binding  
10 We next wanted to determine the relationship between MNase-sensitivity and  
11 transcription factor binding. As we have associated nucleosome sensitivity with active  
12 transcription, we sorted the 20 minute HKST time point into quartiles based on  
13 maximum sensitivity surrounding the TSS. We then sorted transcription factor ChIP-seq  
14 data for NFkB, Pu1, and Efb1 in the same gene order (**Fig. 3**) (Davis et al., 2018). Here  
15 we show that MSFs flank important immune regulatory factors at the TSS during the  
16 immune response to HKST (**Fig. 3**). The presence of MSFs flanking TF binding sites  
17 suggest a regulatory role for these nucleosomes regulating appropriate TF binding.  
18 This observation is concordant with similar results from plants and yeast (Zentner and  
19 Henikoff 2012, Vera et al., 2014, Pass et al., 2017). These results are consistent with a  
20 model in which nucleosomes that provide access to regulatory factor binding sites  
21 necessary for a specific genomic response will be more mobile and this will be reflected  
22 in greater sensitivity to digestion by MNase.

23

1

2 **Discussion**

3

4 In this study we measured changes in chromatin structure at promoters in the human  
5 lymphoblastoid cell line GM12878 in response to stimulation with HKST. Nucleosomal  
6 dynamics occur on a time-scale commensurate with known signaling cascades (Dal  
7 Porto et al., 2001, Harwood and Batista, 2008, Arpaia et al., 2011, Browne 2012).  
8 Specifically, we observed an increase of a -1 positioned nucleosome at more than 2,000  
9 promoters 20 minutes after stimulation with HKST, and these loci represent 14.7% of  
10 the top quartile of expressed genes. This is consistent with important regulatory  
11 functions of the -1/+1 nucleosomes reported first in yeast and *Drosophila*, such as  
12 structure of a nucleosome-free region at the TSS, interaction with RNA Pol II and  
13 transcription factor binding and access to underlying DNA (Svaren and Horz 1995,  
14 Jiang and Pugh 2009, Radman-Livaja and Rando 2010, Ballare et al. 2013, Nie et al.  
15 2014, Voong et al. 2016). Additionally, 800 of these genes are involved with regulation  
16 of RNA pol II transcription in response to stress and recombination of immunoglobulin  
17 genes involved in immune response (**Table S1**). These changes are likely the direct  
18 result of HKST immune stimulus producing an inflammatory signaling cascade that  
19 induces chromatin regulatory mechanisms at the appropriate promoters. We also  
20 observe that the -1 nucleosome occupancy at the 40 and 60 minute post-stimulus  
21 timepoints begins to return to the untreated chromatin architecture. These results are  
22 consistent with the observation that nucleosome remodeling is a transient event (Sexton  
23 et al., 2014, Sexton et al., 2016). These results suggest that nucleosome dynamics may



1 be used as a powerful tool to understand the potential of a cell, beyond the information  
2 that is garnered from gene expression.

3

4 We have also measured promoter nucleosome sensitivity to MNase, showing that  
5 sensitive nucleosomes are associated with active transcription. 20 minutes after HKST  
6 stimulation, we observe greater -1/+1 nucleosome sensitivity that flanks a larger  
7 nucleosome-free region at the TSS. These results are consistent with observations of  
8 nucleosome structure at active promoters; and, the additional information given by  
9 MNase-sensitivity reflects the regulatory potential of loci that contain sensitive  
10 nucleosomes, as reported in yeast, plants, and drosophila (Vera et al. 2014,  
11 Mieczkowski et al., 2016, Pass et al., 2017, Brahma and Henikoff 2019). We  
12 demonstrate that immune transcription factors NFkB, Pu1, and Ebf1 are associated with  
13 positioned sensitive nucleosomes (Garrett-Sinha et al., 1999, Somasundaram et al.,  
14 2015, Schwartz et al., 2016, Willis et al. 2017, Zhang et al., 2017). Time course studies  
15 have shown early and late gene expression changes during B-cell activation,  
16 commensurate with the chromatin structure changes found at promoters following  
17 HKST treatment (Fowler et al., 2015, Hawkins et al. 2015). These changes represent a  
18 new biochemical potential for cells, and studies of the misregulation of the IKK/NFkB  
19 pathway in lymphomas and leukemias show that signal transduction occurs as quickly  
20 as 15 minutes with TNFalpha stimulation (Staudt 2010, Hsieh and Van Etten 2014). *In*  
21 *vitro* studies have shown that TF binding to nucleosomal DNA requires nucleosome  
22 eviction or repositioning, however pioneer TFs can bind to DNA within the bounds of the  
23 nucleosome (Zaret and Carroll 2011, Iwafuchi-Doi and Zaret 2014, Zhu et al. 2018).

1 NFKB has been studied in depth regarding its ability to bind chromatin and induce  
2 immune gene transcription, and it appears to play a diverse role in promoter binding and  
3 activation of genes in hetero- and euchromatic regions of the genome (Lone et al. 2013,  
4 Bhatt and Ghosh 2014, Cieřlik and Bekiranov 2015). The association of these immune  
5 TFs with increased sensitive nucleosomes at the 20 minute time point suggests that  
6 changes in sensitivity create a new chromatin landscape at appropriate promoters,  
7 potentiating regulatory factor binding.

8  
9 A genomic response occurs through multiple regulatory layers, including signaling  
10 cascades, regulatory factors, and the resulting regulation of chromatin structure and  
11 gene expression. Our study adds to a comprehensive understanding of the induction of  
12 immune signaling pathways. Our results add important and complementary information  
13 to existing data showing the importance of the chromatin landscape at promoters  
14 including nucleosome position, localization of regulatory factors and histone post-  
15 translational modifications. The data we show here expounds upon the interplay  
16 between chromatin structure to function, which is consonant with models suggested by  
17 preeminent immunologists (Natoli 2010, Cuartero et al., 2018, Zhang and Cao 2019). In  
18 aggregate, our results suggest that chromatin structure plays a functional role in the  
19 dynamic immune response and that nucleosome sensitivity indicates the regulatory  
20 potential of specific loci that are poised for the appropriate genomic response.

21

22

23

1 **References**

- 2
- 3 Arpaia, N, J Godec, L Lau, KE Sivick, LM McLaughlin, MB Jones, T Dracheva, SN
- 4 Peterson, DM Monack, and GM Barton. 2011. TLR signaling is required for Salmonella
- 5 typhimurium virulence. *Cell* 144, no. 5: 675-688.
- 6
- 7 Ballaré, C, G Castellano, L Gaveglia, S Althammer, J González-Vallinas, E Eyra, F Le
- 8 Dily, R Zaurin, D Soronellas, GP Vicent, and M Beato. 2013. Nucleosome-driven
- 9 transcription factor binding and gene regulation. *Mol Cell* 49, no. 1: 67-79.
- 10
- 11 Bhatt, D, and S Ghosh. 2014. Regulation of the NF- $\kappa$ B-Mediated Transcription of
- 12 Inflammatory Genes. *Front Immunol* 5, 71.
- 13
- 14 Brahma, S, and S Henikoff. 2019. RSC-Associated Subnucleosomes Define MNase-
- 15 Sensitive Promoters in Yeast. *Mol Cell* 73, no. 2: 238-249.e3.
- 16
- 17 Browne, EP. 2012. Regulation of B-cell responses by Toll-like receptors. *Immunology*
- 18 136, no. 4: 370-379.
- 19
- 20 Chereji, RV, TD Bryson, and S Henikoff. 2019. Quantitative MNase-seq accurately
- 21 maps nucleosome occupancy levels. *Genome Biol* 20, no. 1: 198.

22

- 1 Cieřlik, M, and S Bekiranov. 2015. Genome-wide predictors of NF- $\kappa$ B recruitment and  
2 transcriptional activity. *BioData mining*  
3
- 4 Cuartero, S, FD Weiss, G Dharmalingam, Y Guo, E Ing-Simmons, S Masella, I Robles-  
5 Rebollo, X Xiao, YF Wang, I Barozzi, D Djeghloul, MT Amano, H Niskanen, E Petretto,  
6 RD Dowell, K Tachibana, MU Kaikkonen, KA Nasmyth, B Lenhard, G Natoli, AG Fisher,  
7 and M Merckenschlager. 2018. Control of inducible gene expression links cohesin to  
8 hematopoietic progenitor self-renewal and differentiation. *Nat Immunol* 19, no. 9: 932-  
9 941.  
10
- 11 Dal Porto, JM, SB Gauld, KT Merrell, D Mills, AE Pugh-Bernard, and J Cambier. 2004.  
12 B cell antigen receptor signaling 101. *Mol Immunol* 41, no. 6-7: 599-613.  
13
- 14 Davis, CA, BC Hitz, CA Sloan, ET Chan, JM Davidson, I Gabdank, JA Hilton, K Jain,  
15 UK Baymuradov, AK Narayanan, KC Onate, K Graham, SR Miyasato, TR Dreszer, JS  
16 Strattan, O Jolanki, FY Tanaka, and JM Cherry. 2018. The Encyclopedia of DNA  
17 elements (ENCODE): data portal update. *Nucleic Acids Res* 46, no. D1: D794-D801.  
18
- 19 Dorrington, MG, and IDC Fraser. 2019. NF- $\kappa$ B Signaling in Macrophages: Dynamics,  
20 Crosstalk, and Signal Integration. *Front Immunol* 10, 705.  
21

- 1 Druliner, BR, JA Fincher, BS Sexton, DL Vera, M Roche, S Lyle, and JH Dennis. 2013.  
2 Chromatin patterns associated with lung adenocarcinoma progression. *Cell Cycle* 12,  
3 no. 10: 1536-1543.  
4  
5 Eden, E, R Navon, and I Steinfeld.... 2009. GOrilla: a tool for discovery and  
6 visualization of enriched GO terms in ranked gene lists. *BMC Bioinformatics* 10:48  
7  
8 Edgar, R, M Domrachev, and AE Lash. 2002. Gene Expression Omnibus: NCBI gene  
9 expression and hybridization array data repository. *Nucleic Acids Res* 30, no. 1: 207-  
10 210.  
11  
12 El Gazzar, M, T Liu, BK Yoza, and CE McCall. 2010. Dynamic and selective  
13 nucleosome repositioning during endotoxin tolerance. *J Biol Chem* 285, no. 2: 1259-  
14 1271.  
15  
16 Field, Y, N Kaplan, Y Fondufe-Mittendorf, IK Moore, E Sharon, Y Lubling, J Widom, and  
17 E Segal. 2008. Distinct modes of regulation by chromatin encoded through nucleosome  
18 positioning signals. *PLoS Comput Biol* 4, no. 11: e1000216.  
19  
20 Fowler, T, AS Garruss, and A Ghosh.... 2015. Divergence of transcriptional landscape  
21 occurs early in B cell activation. *Epigenetics & Chromatin*, 14;8:20  
22

- 1 Gaffney, DJ, G McVicker, AA Pai, YN Fondufe-Mittendorf, N Lewellen, K Michelini, J  
2 Widom, Y Gilad, and JK Pritchard. 2012. Controls of nucleosome positioning in the  
3 human genome. *PLoS Genet* 8, no. 11: e1003036.  
4  
5 Garrett-Sinha, LA, GH Su, S Rao, S Kabak, and Z Hao.... 1999. PU. 1 and Spi-B are  
6 required for normal B cell receptor-mediated signal transduction. *Immunity*  
7  
8 Gupta, S, J Dennis, RE Thurman, R Kingston, JA Stamatoyannopoulos, and WS Noble.  
9 2008. Predicting human nucleosome occupancy from primary sequence. *PLoS Comput*  
10 *Biol* 4, no. 8: e1000134.  
11  
12 Harwood, NE, and FD Batista. 2008. New insights into the early molecular events  
13 underlying B cell activation. *Immunity* 28, no. 5: 609-619.  
14  
15 Hawkins, ED, ML Turner, CJ Wellard, and JHS Zhou.... 2013. Quantal and graded  
16 stimulation of B lymphocytes as alternative strategies for regulating adaptive immune  
17 responses. *Nature Comm.* 4, 2406  
18  
19 Herschman, HR. 1991. Primary response genes induced by growth factors and tumor  
20 promoters. *Annu Rev Biochem* 60, 281-319.  
21  
22 Hsieh, MY, and RA Van Etten. 2014. IKK-dependent activation of NF- $\kappa$ B contributes to  
23 myeloid and lymphoid leukemogenesis by BCR-ABL1. *Blood*

- 1
- 2 lwafuchi-Doi, M, and KS Zaret. 2014. Pioneer transcription factors in cell  
3 reprogramming. *Genes Dev* 28, no. 24: 2679-2692.
- 4
- 5 Jiang, C, and BF Pugh. 2009. Nucleosome positioning and gene regulation: advances  
6 through genomics. *Nat Rev Genet* 10, no. 3: 161-172.
- 7
- 8 Kaplan, N, IK Moore, Y Fondufe-Mittendorf, AJ Gossett, D Tillo, Y Field, EM LeProust,  
9 TR Hughes, JD Lieb, J Widom, and E Segal. 2009. The DNA-encoded nucleosome  
10 organization of a eukaryotic genome. *Nature* 458, no. 7236: 362-366.
- 11
- 12 Kornberg, RD, and Y Lorch. 1999. Twenty-five years of the nucleosome, fundamental  
13 particle of the eukaryote chromosome. *Cell* 98, no. 3: 285-294.
- 14
- 15 Lone, IN, MS Shukla, JL Charles Richard, ZY Peshev, S Dimitrov, and D Angelov.  
16 2013. Binding of NF- $\kappa$ B to nucleosomes: effect of translational positioning, nucleosome  
17 remodeling and linker histone H1. *PLoS Genet* 9, e1003830.
- 18
- 19 Mieczkowski, J, A Cook, SK Bowman, and B Mueller.... 2016. MNase titration reveals  
20 differences between nucleosome occupancy and chromatin accessibility. *Nature Comm.*  
21 *7, 11485*

- 1 Natoli, G. 2010. Maintaining cell identity through global control of genomic organization.  
2 *Immunity* 33, no. 1: 12-24.  
3
- 4 Nie, Y, X Cheng, J Chen, and X Sun. 2014. Nucleosome organization in the vicinity of  
5 transcription factor binding sites in the human genome. *BMC Genomics* 15, 493.  
6
- 7 Pass, DA, E Sornay, A Marchbank, MR Crawford, K Paszkiewicz, NA Kent, and JAH  
8 Murray. 2017. Genome-wide chromatin mapping with size resolution reveals a dynamic  
9 sub-nucleosomal landscape in Arabidopsis. *PLoS Genet* 13, no. 9: e1006988.  
10
- 11 Pruitt, KD, T Tatusova, W Klimke, and DR Maglott. 2009. NCBI Reference Sequences:  
12 current status, policy and new initiatives. *Nucleic Acids Res* 37, no. Database issue:  
13 D32-6.  
14
- 15 Radman-Livaja, M, and OJ Rando. 2010. Nucleosome positioning: how is it established,  
16 and why does it matter. *Developmental biology*  
17
- 18 Ramirez-Carrozzi, VR, AA Nazarian, CC Li, SL Gore, R Sridharan, AN Imbalzano, and  
19 ST Smale. 2006. Selective and antagonistic functions of SWI/SNF and Mi-2beta  
20 nucleosome remodeling complexes during an inflammatory response. *Genes Dev* 20,  
21 no. 3: 282-296.  
22



- 1 Rando, OJ. 2012. Combinatorial complexity in chromatin structure and function:  
2 revisiting the histone code. *Curr Opin Genet Dev* 22, no. 2: 148-155.  
3
- 4 Schwartz, AM, LV Putlyaeva, and M Covich.... 2016. Early B-cell factor 1 (EBF1) is  
5 critical for transcriptional control of SLAMF1 gene in human B cells. *Biochim et*  
6 *Biophysica Acta (BBA)*, 1859(10):1259-68  
7
- 8 Sexton, BS, D Avey, BR Druliner, JA Fincher, DL Vera, DJ Grau, ML Borowsky, S  
9 Gupta, SB Girimurugan, E Chicken, J Zhang, WS Noble, F Zhu, RE Kingston, and JH  
10 Dennis. 2014. The spring-loaded genome: nucleosome redistributions are widespread,  
11 transient, and DNA-directed. *Genome Res* 24, no. 2: 251-259.  
12
- 13 Sexton, BS, BR Druliner, DL Vera, D Avey, F Zhu, and JH Dennis. 2016. Hierarchical  
14 regulation of the genome: global changes in nucleosome organization potentiate  
15 genome response. *Oncotarget* 7, no. 6: 6460-6475.  
16
- 17 Shivaswamy, S, A Bhinge, Y Zhao, S Jones, M Hirst, and VR Iyer. 2008. Dynamic  
18 remodeling of individual nucleosomes across a eukaryotic genome in response to  
19 transcriptional perturbation. *PLoS Biol* 6, no. 3: e65.  
20
- 21 Somasundaram, R, MAJ Prasad, and J Ungerback.... 2015. Transcription factor  
22 networks in B-cell differentiation link development to acute lymphoid leukemia. *Blood*

- 1 Staudt, LM. 2010. Oncogenic activation of NF- $\kappa$ B. *Cold Spring Harbor perspectives in*  
2 *biology*
- 3
- 4 Sun, YL, YZ Xu, M Bellard, and P Chambon. 1986. Digestion of the chicken beta-globin  
5 gene chromatin with micrococcal nuclease reveals the presence of an altered  
6 nucleosomal array characterized by an atypical ladder of DNA fragments. *EMBO J* 5,  
7 no. 2: 293-300.
- 8
- 9 Svaren, J, and W Hörz. 1995. Interplay between nucleosomes and transcription factors  
10 at the yeast PHO5 promoter. *Semin Cell Biol* 6, no. 4: 177-183.
- 11
- 12 Vera, DL, TF Madzima, JD Labonne, MP Alam, GG Hoffman, SB Girimurugan, J Zhang,  
13 KM McGinnis, JH Dennis, and HW Bass. 2014. Differential nuclease sensitivity profiling  
14 of chromatin reveals biochemical footprints coupled to gene expression and functional  
15 DNA elements in maize. *Plant Cell* 26, no. 10: 3883-3893.
- 16
- 17 Voong, LN, L Xi, AC Sebeson, B Xiong, JP Wang, and X Wang. 2016. Insights into  
18 Nucleosome Organization in Mouse Embryonic Stem Cells through Chemical Mapping.  
19 *Cell* 167, no. 6: 1555-1570.e15.
- 20
- 21 Willis, SN, J Tellier, Y Liao, S Trezise, and A Light.... 2017. Environmental sensing by  
22 mature B cells is controlled by the transcription factors PU. 1 and SpiB. *Nature Comm*  
23 *10;8(1):1426*

- 1
- 2 Winkles, JA. 1998. Serum- and polypeptide growth factor-inducible gene expression in  
3 mouse fibroblasts. *Prog Nucleic Acid Res Mol Biol* 58, 41-78.
- 4
- 5 Zaret, KS, and JS Carroll. 2011. Pioneer transcription factors: establishing competence  
6 for gene expression. *Genes & development* 25(21):2227-41
- 7
- 8 Zentner, GE, and S Henikoff. 2012. Surveying the epigenomic landscape, one base at a  
9 time. *Genome biology* 13, Article number: 250
- 10
- 11 Zhang, Q, and X Cao. 2019. Epigenetic regulation of the innate immune response to  
12 infection. *Nat Rev Immunol* 19, no. 7: 417-432.
- 13
- 14 Zhang, Q, MJ Lenardo, and D Baltimore. 2017. 30 years of NF- $\kappa$ B: a blossoming of  
15 relevance to human pathobiology. *Cell* 168(1-2):37-57
- 16
- 17 Zhu, F, L Farnung, E Kaasinen, B Sahu, Y Yin, and B Wei.... 2018. The interaction  
18 landscape between transcription factors and the nucleosome. *Nature* 562, 76–81
- 19

1 **Figure Legends**

2 **Figure 1 | Nucleosome occupancy changes during time course stimulation with**

3 **HKST.**(A) Total nucleosome fragments sorted into quartiles based on maximum signal.

4 All heatmaps sorted in the same order, -1000bp/+1000bp surrounding the TSS for all

5 RefSeq open reading frames. Yellow indicates presence of nucleosomal fragment. (B)

6 The log<sub>2</sub>ratio of the untreated sample and HKST time points: 20, 40, and 60 minutes

7 post-stimulus. Resulting Log<sub>2</sub>ratio heatmaps sorted by kmeans clustering (k=7). All

8 heatmaps sorted in the same order, -1000bp/+1000bp surrounding the TSS for all

9 RefSeq open reading frames. Red indicates more nucleosomal fragments present in the

10 untreated GM12878 cells and cyan indicates increased nucleosomal fragments in the

11 stimulus timepoint. (C) Table of gene ontology enrichment for the promoters which gain

12 -1 nucleosome fragments in the 20m HKST timepoint.

13

14 **Figure 2 | Sensitive nucleosomes are associated with transcription and**

15 **nucleosome sensitivity changes during HKST stimulation.** MNase sensitivity of

16 untreated GM12878 and 20m HKST-treated cells were sorted into quartiles based on

17 total expression (GSM2344230). ChIPseq data for actively transcribing Pol2ser2 was

18 sorted into quartiles based on the same sort order. Blue indicates MNase-resistant

19 nucleosomal fragments and yellow indicates MNase-sensitive nucleosomal fragments.

20

21 **Figure 3 | Sensitive nucleosomes flank transcription factor binding sites.** MNase-

22 sensitivity of nucleosomes at 20m post-HKST stimulation was sorted into quartiles

- 1 based on maximum sensitivity followed by ChIPseq peaks of immune transcription
- 2 factors NFkB, Pu1, Ebf1 in the same sort order.
- 3

Figure 1

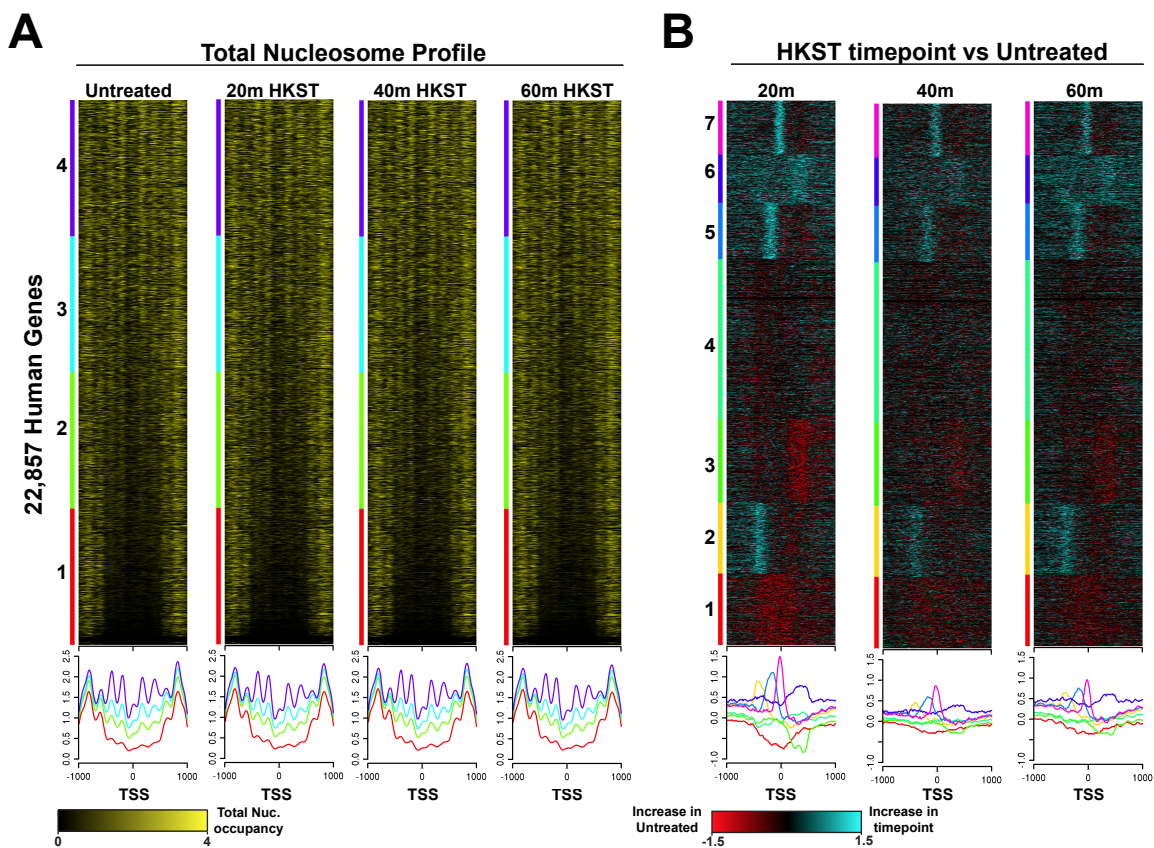

**C**

| GO term    | Description                                                            | P-value  |
|------------|------------------------------------------------------------------------|----------|
| GO:0051606 | detection of stimulus                                                  | 1.20E-08 |
| GO:0008380 | RNA splicing                                                           | 6.17E-08 |
| GO:0033141 | positive regulation of peptidyl-serine phosphorylation of STAT protein | 2.74E-07 |
| GO:0006397 | mRNA processing                                                        | 3.82E-07 |
| GO:0002323 | natural killer cell activation involved in immune response             | 1.02E-06 |
| GO:0033139 | regulation of peptidyl-serine phosphorylation of STAT protein          | 1.02E-06 |
| GO:0007606 | sensory perception of chemical stimulus                                | 1.41E-06 |
| GO:0065004 | protein-DNA complex assembly                                           | 1.82E-06 |
| GO:0002286 | T cell activation involved in immune response                          | 4.11E-06 |
| GO:0006334 | nucleosome assembly                                                    | 5.59E-06 |
| GO:0071824 | protein-DNA complex subunit organization                               | 6.75E-06 |
| GO:0034728 | nucleosome organization                                                | 2.72E-05 |
| GO:0042100 | B cell proliferation                                                   | 4.16E-05 |



Figure 2

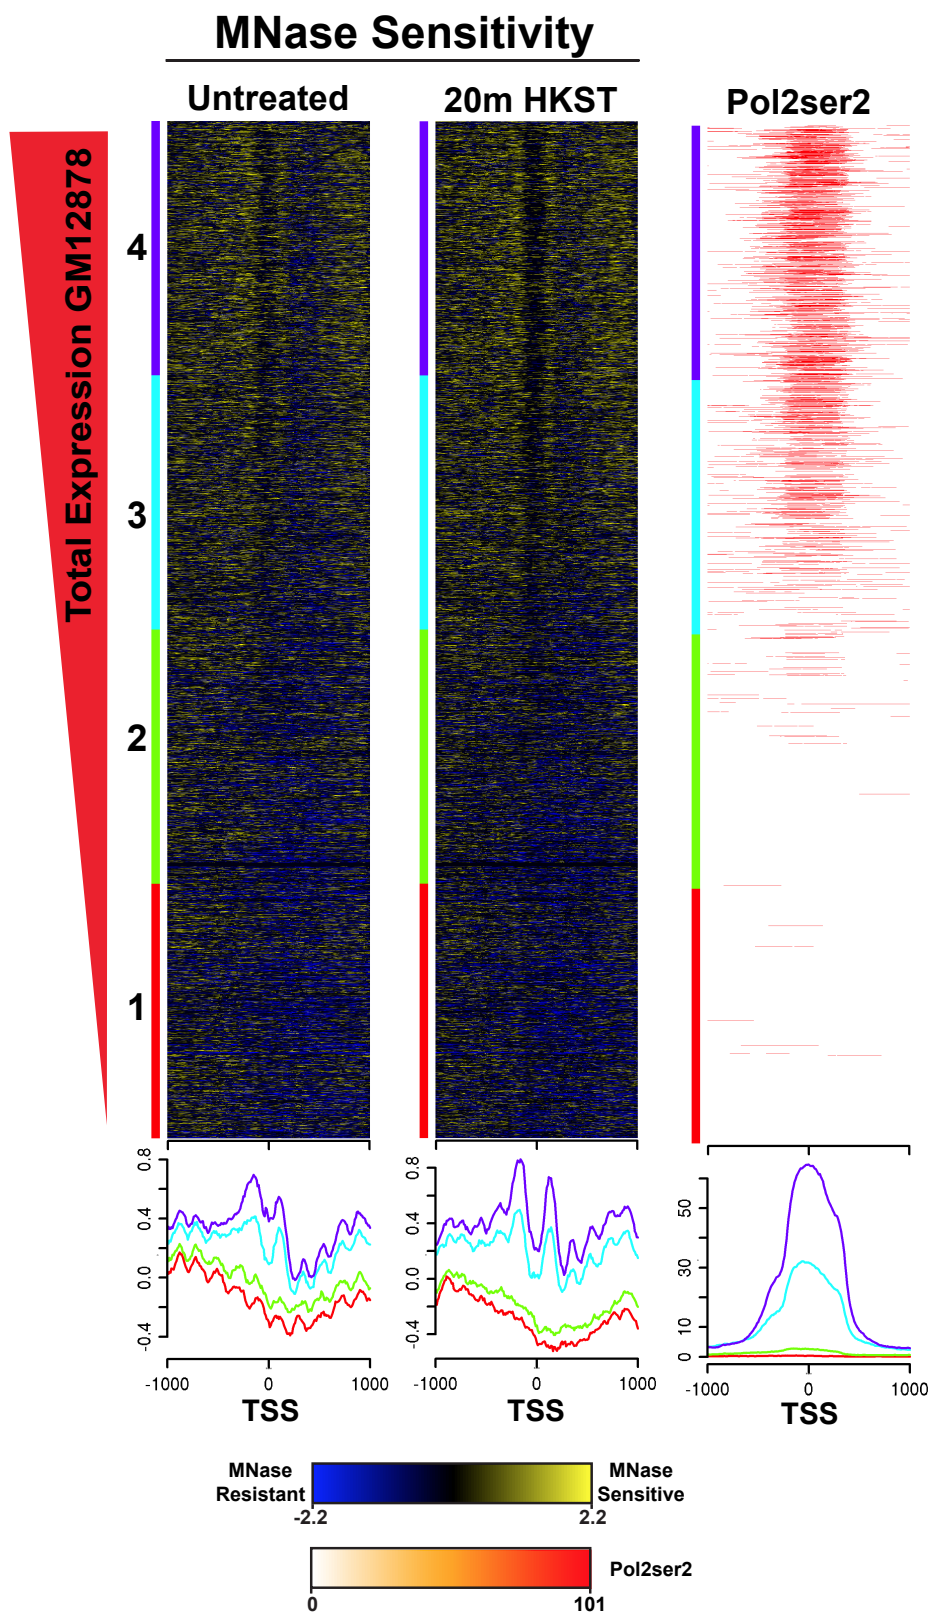

Figure 3

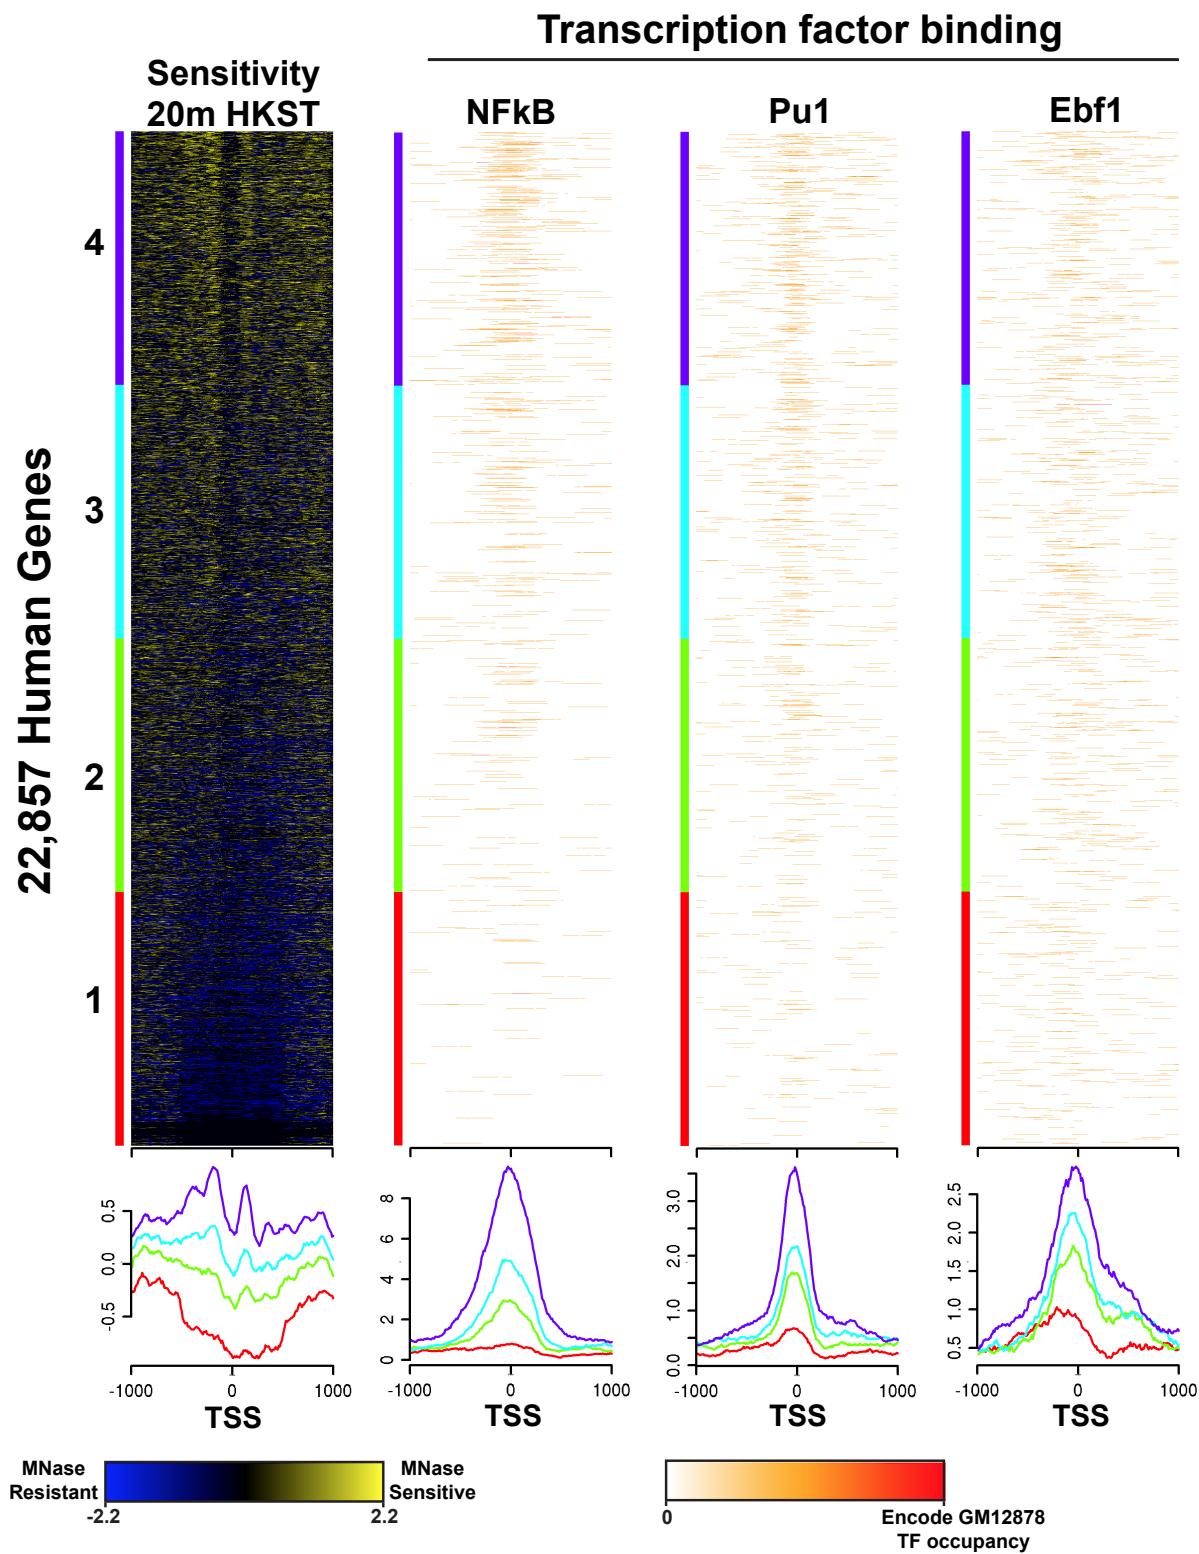



1 **Supplementary Information**

2

3 **Figure S1. Specific enrichment of MNase-seq fragments at promoters using mTSS-Seq,**  
4 **related to all figures.**

5 (A) Average plot of sequence-captured GM12878 MNase-seq data across the TSS +/- 1000bp,  
6 all fragments.

7 (B) Histogram of fragment sizes for GM12878 heavy and light digests

8 (C) Schematic demonstrating targeted enrichment with hg19 SeqCap oligos (mTSS-seq).

9 GM12878 Untreated data for chromosome 20 shown in the UCSC genome browser  
10 (genome.ucsc.edu), with multiple magnifications down to a single TSS, CD40, compared to a  
11 previously published nucleosome mapping data set from Gaffney et al., 2012.

12

13 **Figure S2. MNase-sensitive of all promoters based on untreated GM12878 cells, related to**  
14 **Figure 2.**

15 The log<sub>2</sub>ratio of light/heavy MNase digest (MNase sensitivity) was determined for all human  
16 promoters centered on the TSS (+/-1kb). The MNase sensitivity for the untreated control cells  
17 was sorted with k-means clustering (k=7) followed by the MNase sensitivity for the 20, 40, and  
18 60 minute post-HKST stimulation data sets on the same sort order. Average profiles per cluster  
19 are shown below the heatmaps for each time point. The left most heatmap dictates the sort  
20 order for all other maps in the panel.

21

22

23 **Table S1. Results of the gene ontology analysis and gene lists for cluster 5, related to**  
24 **Figure 1.**

25

26 **Table S2. Results of the gene ontology analysis and gene list for cluster 1, related to Figure**  
27 **1.**

28

29

30

31

Figure S1

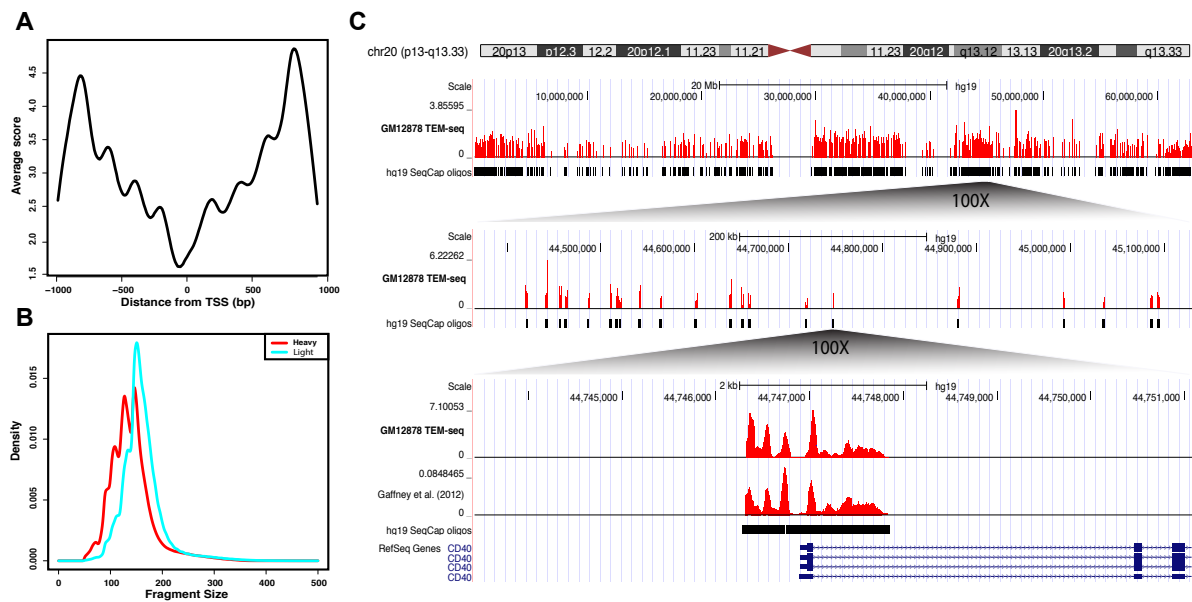

Figure S2

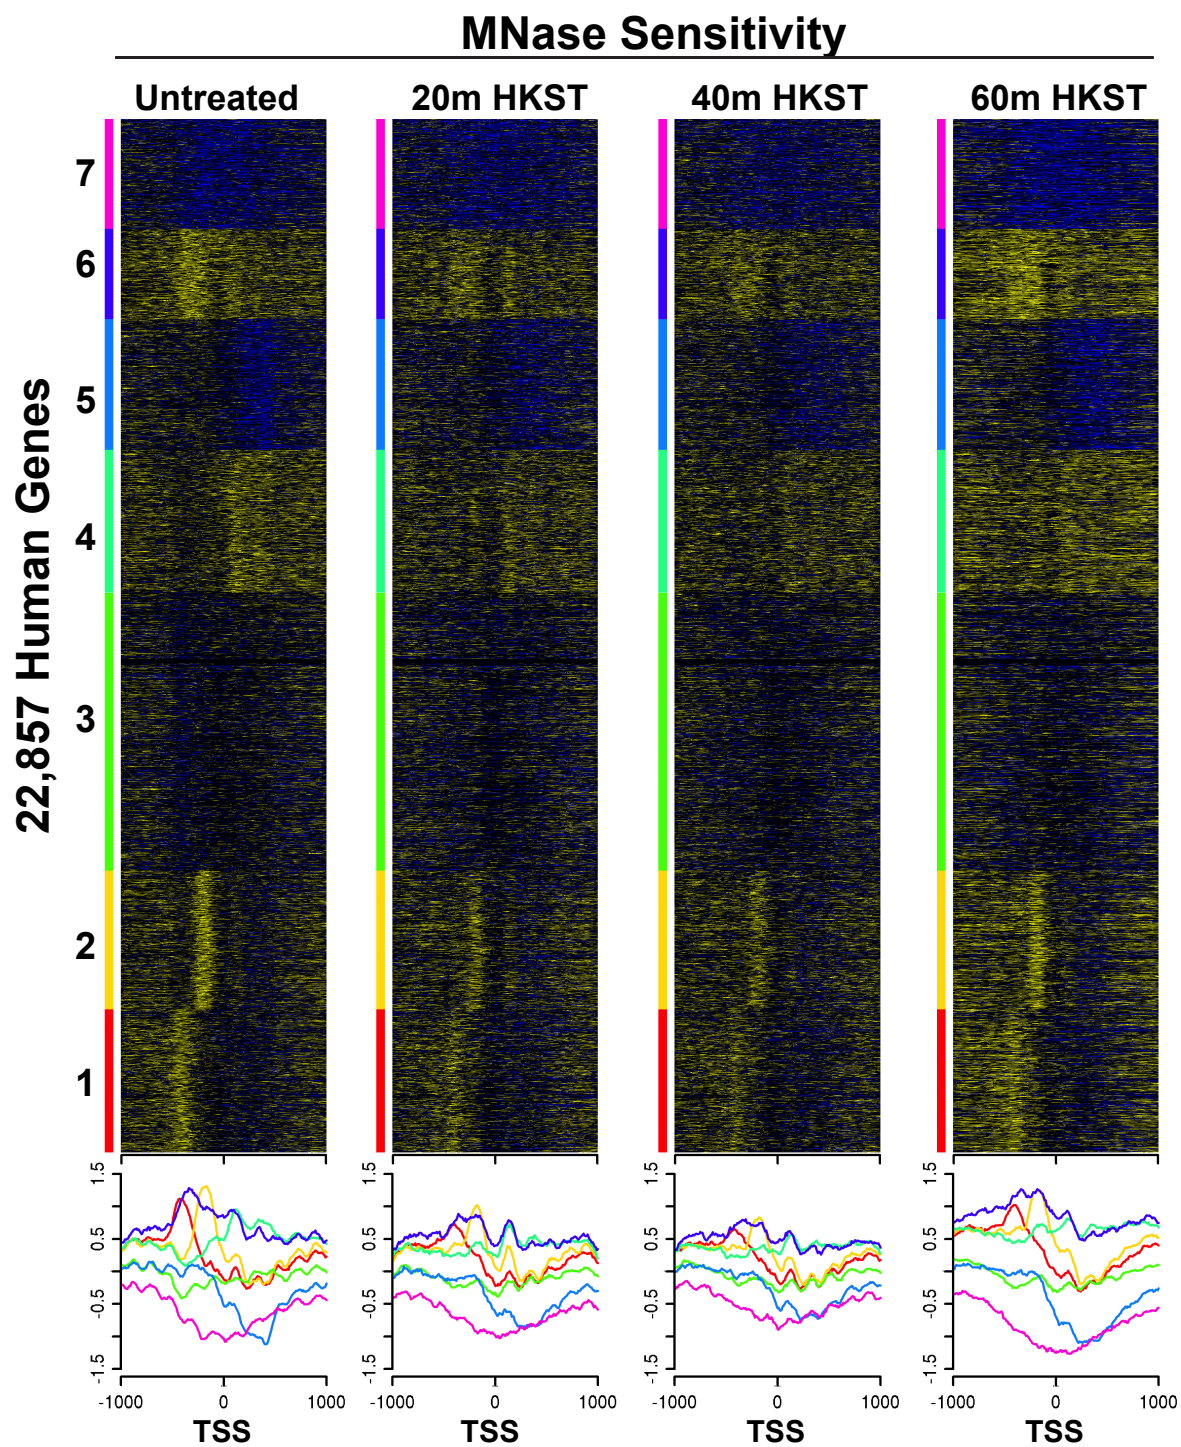

Source: https://www.biorxiv.org/content/10.1101/816348v1.full.pdf
